# Supplementary material
Source: PubMed Central journal article supplement (PMC3374737)
Supplement: supp_111.030353_ajcn030353-ST1.pdf [file supp_111.030353_ajcn030353-ST1.pdf]

## SUPPLEMENTAL TABLE

**Supplemental Table 1.** Effect of polyamine intake (by quartile) on colorectal adenoma at follow-up colonoscopy in the control arms from both trials (Wheat Bran Fiber Trial low-fiber arm and Ursodeoxycholic Acid Trial placebo arm), stratified by sex and sex-specific folate exposure.

| Polyamine intake<br>(Sex-specific<br>quartiles <sup>2</sup> ) | Women                                          |          | Women                                        |          | Men                                            |          | Men                                          |          |
|---------------------------------------------------------------|------------------------------------------------|----------|----------------------------------------------|----------|------------------------------------------------|----------|----------------------------------------------|----------|
|                                                               | Low folate<br>( $\leq 579$ $\mu\text{g/day}$ ) |          | High folate<br>( $> 579$ $\mu\text{g/day}$ ) |          | Low folate<br>( $\leq 552$ $\mu\text{g/day}$ ) |          | High folate<br>( $> 552$ $\mu\text{g/day}$ ) |          |
|                                                               | OR (95% CI) <sup>1</sup>                       | <i>n</i> | OR (95% CI) <sup>1</sup>                     | <i>n</i> | OR (95% CI) <sup>1</sup>                       | <i>n</i> | OR (95% CI) <sup>1</sup>                     | <i>n</i> |
| 1                                                             | 1.00                                           | 64       | 1.00                                         | 36       | 1.00                                           | 115      | 1.00                                         | 77       |
| 2                                                             | 0.99 (0.42–2.36)                               | 49       | 0.77 (0.30–2.01)                             | 50       | 1.21 (0.68–2.14)                               | 109      | 0.67 (0.34–1.32)                             | 82       |
| 3                                                             | 2.65 (1.00–7.05)                               | 38       | 0.99 (0.39–2.53)                             | 62       | 0.83 (0.45–1.54)                               | 85       | 1.52 (0.77–2.99)                             | 107      |
| 4                                                             | 1.40 (0.50–3.91)                               | 48       | 2.63 (0.94–7.36)                             | 51       | 0.96 (0.49–1.89)                               | 74       | 0.94 (0.45–1.97)                             | 117      |
| <i>P</i> trend <sup>3</sup>                                   | 0.262                                          |          | 0.043*                                       |          | 0.619                                          |          | 0.586                                        |          |

\*  $P < 0.05$

<sup>1</sup> Odds ratio (OR) and 95% confidence interval (CI) calculated using unconditional logistic regression adjusted for age, sex, trial, energy intake and follow-up time

<sup>2</sup> Polyamine intake ( $\mu\text{mol/day}$ ) quartile ranges for each sex separately: Quartile 1 (women, 35 – 177; men, 40 – 207); Quartile 2 (women, 187 – 262; men, 207 – 297); Quartile 3 (women, 266 – 396; men, 298 – 425); Quartile 4 (women, 398 – 1183; men, 425 – 1295)

<sup>3</sup> *P* value for the interaction between folate (above or below sex-specific medians) and polyamines (continuous) intake by sex calculated using a likelihood ratio test: in women (*P* = 0.033) and in men (*P* = 0.718)
